# Supplementary material for: Both variants of A1CF and BAZ1B genes are associated with gout susceptibility: a replication study and meta-analysis in a Japanese population
Source: PubMed Central journal article supplement (PMC7900071; doi:10.1007/s13577-021-00485-4), 2021-01-31
Supplement: 13577_2021_485_MOESM1_ESM.pdf [file 13577_2021_485_MOESM1_ESM.pdf]

## Supplementary Information

### Both variants of *AICF* and *BAZIB* genes are associated with gout susceptibility: A replication study and meta-analysis in a Japanese population

Makoto Kawaguchi, Akiyoshi Nakayama, *et al.*

Correspondence to Hirotaka Matsuo (email: hmatsuo.ndmc@gmail.com)

**Supplementary Table S1** Association analysis between *AICF* and *BAZIB* and gout with and without dysfunctional variants of “gout gene” *ABCG2*.

| Gene         | Dysfunctional variants of <i>ABCG2</i> <sup>a</sup> | Genotype <sup>b</sup> |     |     |        |         |     |     |        | Allele frequency mode       |                    |
|--------------|-----------------------------------------------------|-----------------------|-----|-----|--------|---------|-----|-----|--------|-----------------------------|--------------------|
|              |                                                     | Case                  |     |     |        | Control |     |     |        | <i>p</i> value <sup>c</sup> | OR (95% CI)        |
|              |                                                     | 1/1                   | 1/2 | 2/2 | RAF    | 1/1     | 1/2 | 2/2 | RAF    |                             |                    |
| <i>AICF</i>  | (+)                                                 | 925                   | 114 | 3   | 0.0576 | 581     | 47  | 1   | 0.0390 | 0.0172                      | 1.51 (1.07 – 2.12) |
|              | (-)                                                 | 327                   | 36  | 0   | 0.0496 | 587     | 59  | 1   | 0.0471 | 0.805                       | 1.05 (0.69 – 1.61) |
| <i>BAZIB</i> | (+)                                                 | 4                     | 173 | 862 | 0.913  | 8       | 121 | 496 | 0.890  | 0.0325                      | 1.29 (1.02 – 1.63) |
|              | (-)                                                 | 2                     | 50  | 312 | 0.926  | 6       | 119 | 520 | 0.898  | 0.0407                      | 1.41 (1.01 – 1.96) |

*RAF* risk allele frequency; *OR*, odds ratio; *CI*, confidence interval.

<sup>a</sup>The two commonest dysfunctional variants of *ABCG2*, Q126X (rs72552713) and Q141K (rs2231142), were investigated (ref. 8 in the main text).

<sup>b</sup>The non-risk allele referred to as allele 1 and the risk allele as 2. Allele 1 is G and allele 2 is A in both rs10821905 of *AICF* and rs1178977 of *BAZIB*.

<sup>c</sup>*P*-values were obtained by chi-squared tests.
